# Supplementary material for: Lipin-1 Deficiency-Associated Recurrent Rhabdomyolysis and Exercise-Induced Myalgia Persisting into Adulthood: A Case Report and Review of Literature
Source: Hindawi journal article supplement (doi:10.1155/2020/7904190), 2020-05-28

# Body composition of the patient measured by bioelectrical impedance analysis (BIA) technology

(Tanita MC-980 Body Composition Analyzer)

## ■ Details

| MC-780        | Result  | Desirable    | Target |    |
|---------------|---------|--------------|--------|----|
| Weight        | 61.8 kg | 44.4-60.1 kg | kg     | kg |
| Fat           | 40.2 %  | 21.0-35.0 %  | %      | %  |
| Fat Mass      | 24.8 kg | 9.8-19.9 kg  | kg     | kg |
| FFM           | 37.0 kg |              |        |    |
| Muscle Mass   | 34.9 kg | 33.2-37.8    |        |    |
| BMI           | 25.7    | 18.5-25.0    |        |    |
| Metabolic Age | 48.0    |              |        |    |

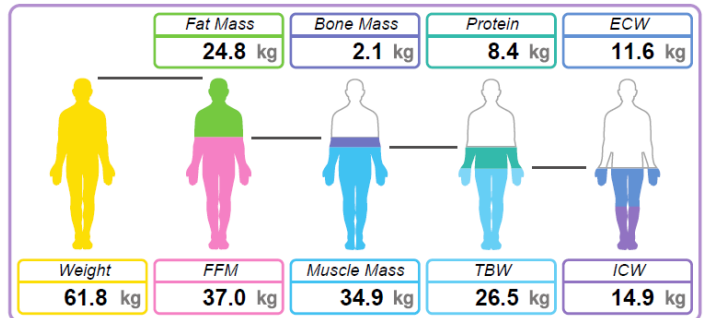

## ■ BMR VFA TBW

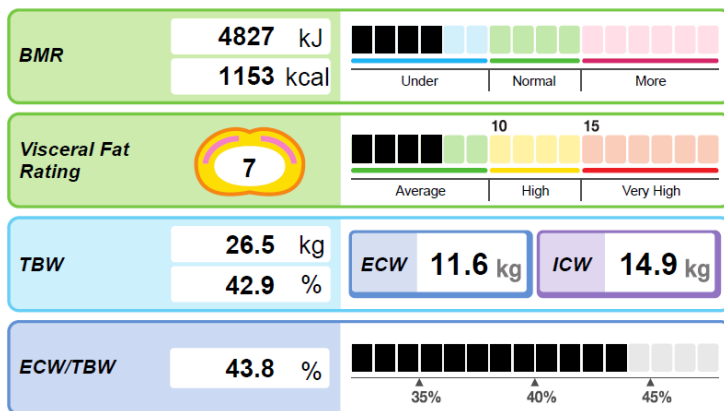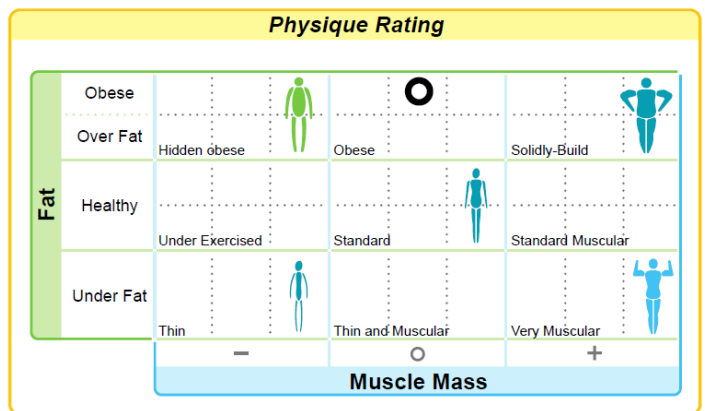

## ■ Segmental Analysis

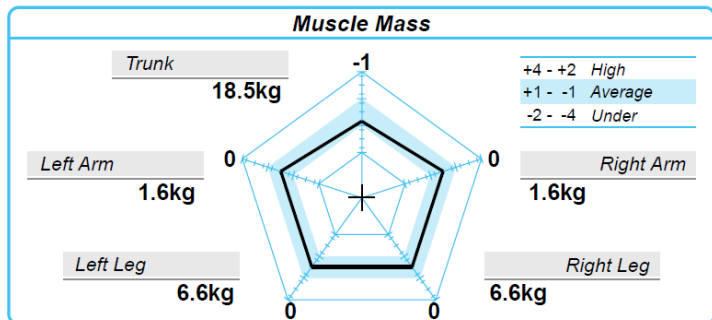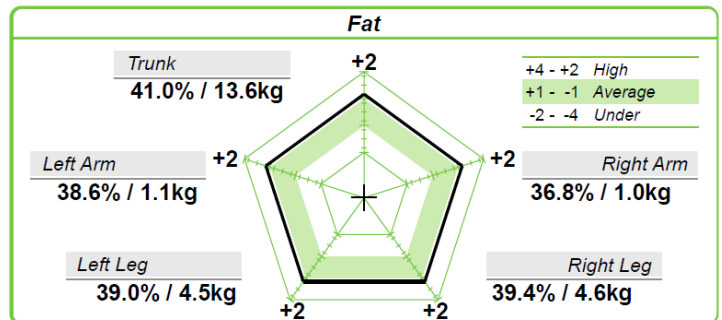

## ■ Balance

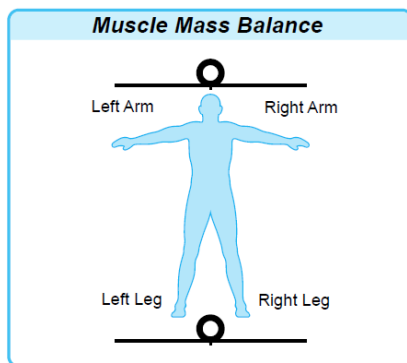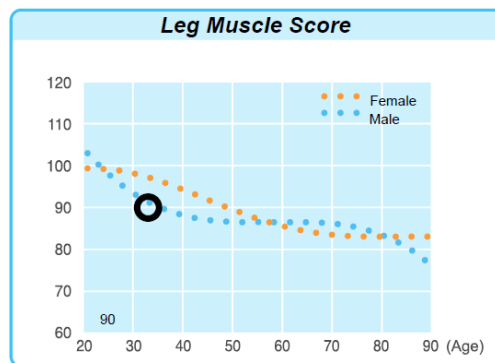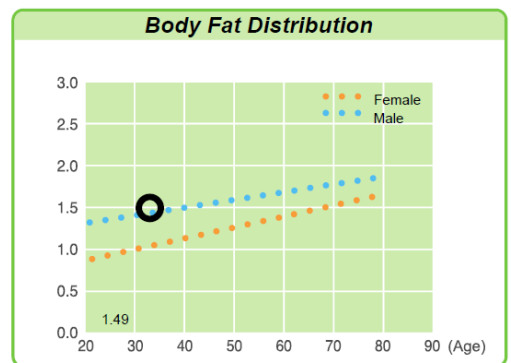

Supplement: f1 [file 7904190.f1.pdf]
